# Supplementary material for: Revealing the growth of copper on polystyrene-block-poly(ethylene oxide) diblock copolymer thin films with in situ GISAXS
Source: Royal Society of Chemistry journal article supplement (doi:10.1039/d1nr01480c), 2021-01-01
Supplement: d1nr01480c1.pdf [file d1nr01480c1.pdf]

## Nanoscale

### Electronic supplementary information

#### Revealing the growth of copper on polystyrene-*block*-poly(ethylene oxide) diblock copolymer thin films with *in situ* GISAXS

Simon J. Schaper,<sup>a</sup> Franziska C. Löhner,<sup>a</sup> Senlin Xia,<sup>a</sup> Christina Geiger,<sup>a</sup> Matthias Schwartzkopf,<sup>b</sup> Pallavi Pandit,<sup>b</sup> Jan Rubeck,<sup>b</sup> Björn Fricke,<sup>b</sup> Susann Frencke,<sup>b</sup> Alexander M. Hinz,<sup>c†</sup> Niko Carstens,<sup>c</sup> Oleksandr Polonskyi,<sup>c‡</sup> Thomas Strunskus,<sup>c</sup> Franz Faupel,<sup>c</sup> Stephan V. Roth,<sup>bd</sup> and Peter Müller-Buschbaum,<sup>\*ae</sup>

#### Cu-polymer interfaces in LIBs

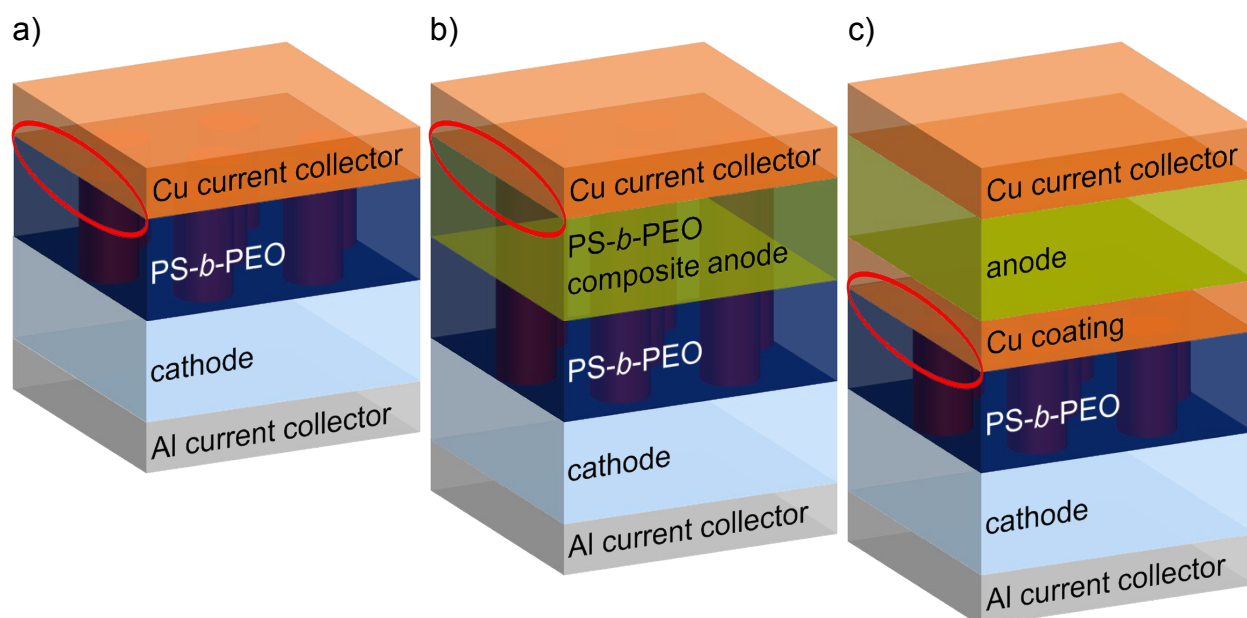

Figure S1 Simplified schematic cross sections of LIBs with Cu/PS-*b*-PEO interfaces (red ellipses): a) anode free LIB, b) LIB with polymer composite anode (e.g. with 32 wt% PS-*b*-PEO), and c) LIB with anode Cu coating and PS-*b*-PEO polymer electrolyte.

<sup>a</sup> Lehrstuhl für Funktionelle Materialien, Physik-Department, Technische Universität München, James-Frank-Str. 1, 85748 Garching, Germany  
E-mail: muellerb@ph.tum.de

<sup>b</sup> Photon Science, Deutsches Elektronen-Synchrotron (DESY), Notkestr. 85, 22607 Hamburg, Germany

<sup>c</sup> Lehrstuhl für Materialverbunde, Institut für Materialwissenschaft, Christian-Albrechts-Universität zu Kiel, Kaiserstr. 2, 24143 Kiel, Germany

<sup>d</sup> KTH Royal Institute of Technology, Department of Fibre and Polymer Technology, Teknikringen 56-58, SE-100 44 Stockholm, Sweden

<sup>e</sup> Heinz Maier-Leibniz Zentrum (MLZ), Technische Universität München, Lichtenbergstr. 1, 85748 Garching, Germany

<sup>†</sup> Fraunhofer Institut für Organische Elektronik, Elektronenstrahl- und Plasmatechnik FEP, Winterbergstr. 28, 01277 Dresden, Germany

<sup>‡</sup> Dept. of Chemical Engineering, University of California, Santa Barbara, Santa Barbara, CA 93106-5080

## Atomic force microscopy (AFM)

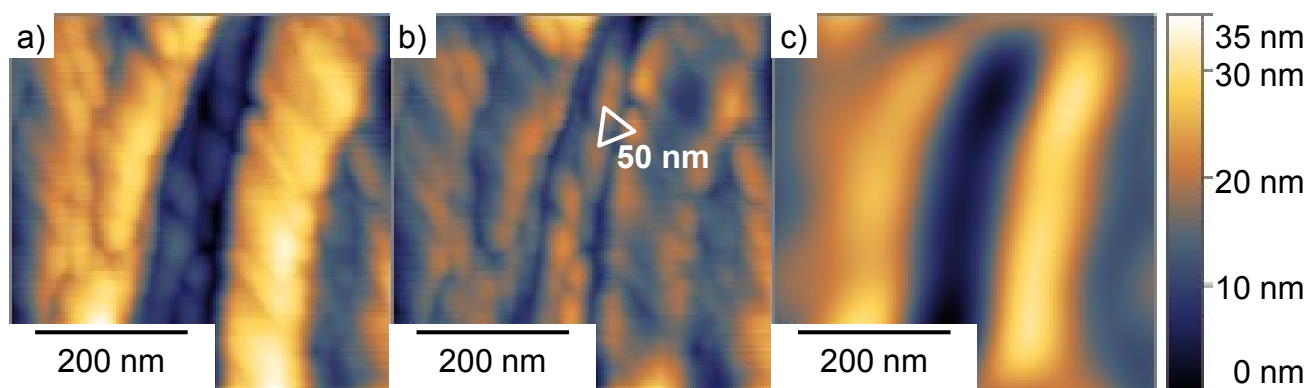

Figure S2 AFM images of bare PS-*b*-PEO polymer thin film surface: (a) without filtering, (b) filtered image and (c) filter residuum. An equilateral triangle (white in b) is visualizing the domain distance of the PS blocks in the PEO matrix. The applied 2DFFT filter is used to highlight the roughness at the PS-*b*-PEO film surface at large distances and the local hexagonal arrangement at smaller distances (around 50 nm).

## Scanning electron microscopy (SEM)

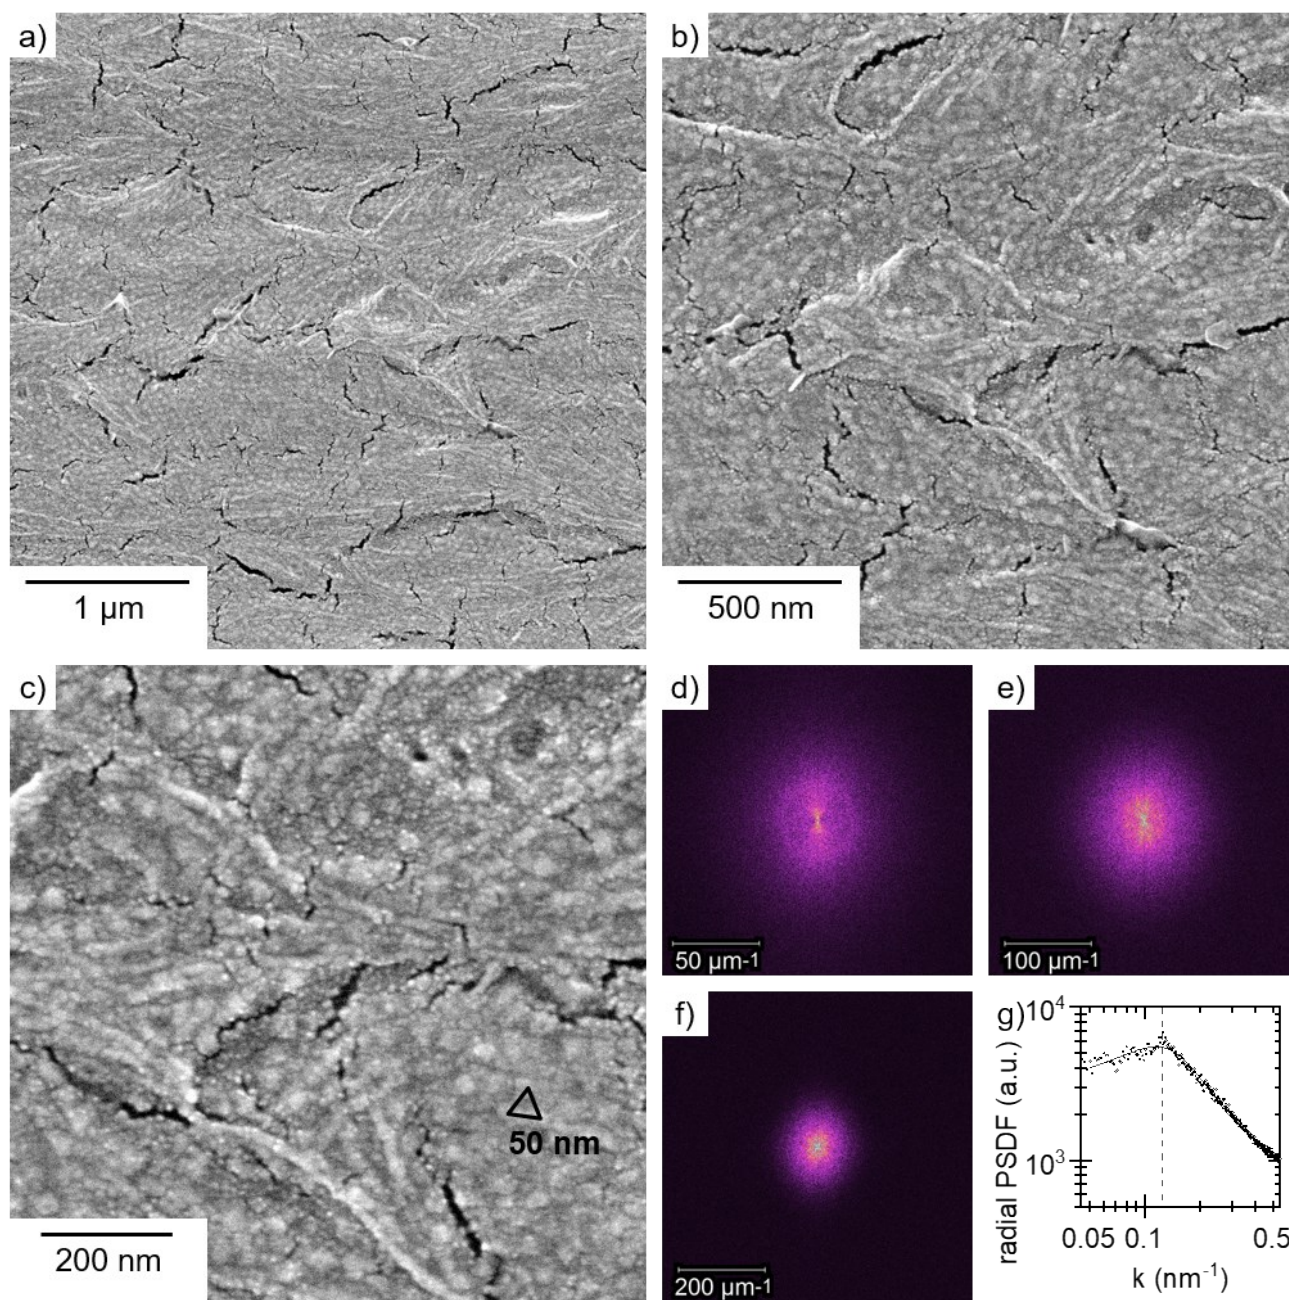

Figure S3 Scanning electron microscopy (SEM) images of  $(10.7 \pm 0.1)$  nm Cu sputter deposited on PS-*b*-PEO at taken at magnifications of (a) 20000, (b) 40000, and (c) 80000 with an acceleration voltage of 5 keV. An equilateral triangle with side length of 50 nm highlights the local hexagonal arrangement. 2D power spectral density functions (PSDF) of the SEM data with (d) 20000, (e) 40000, and (f) 80000 magnification reveal the lack of long range order. (g) Radial integration (points) of the PSDF (d) is shown with a Lorentzian fit (line) and the maximum at  $0.125 \text{ nm}^{-1}$  (dashed line), corresponding to a distance of 50 nm.

## Cu cluster growth and agglomeration

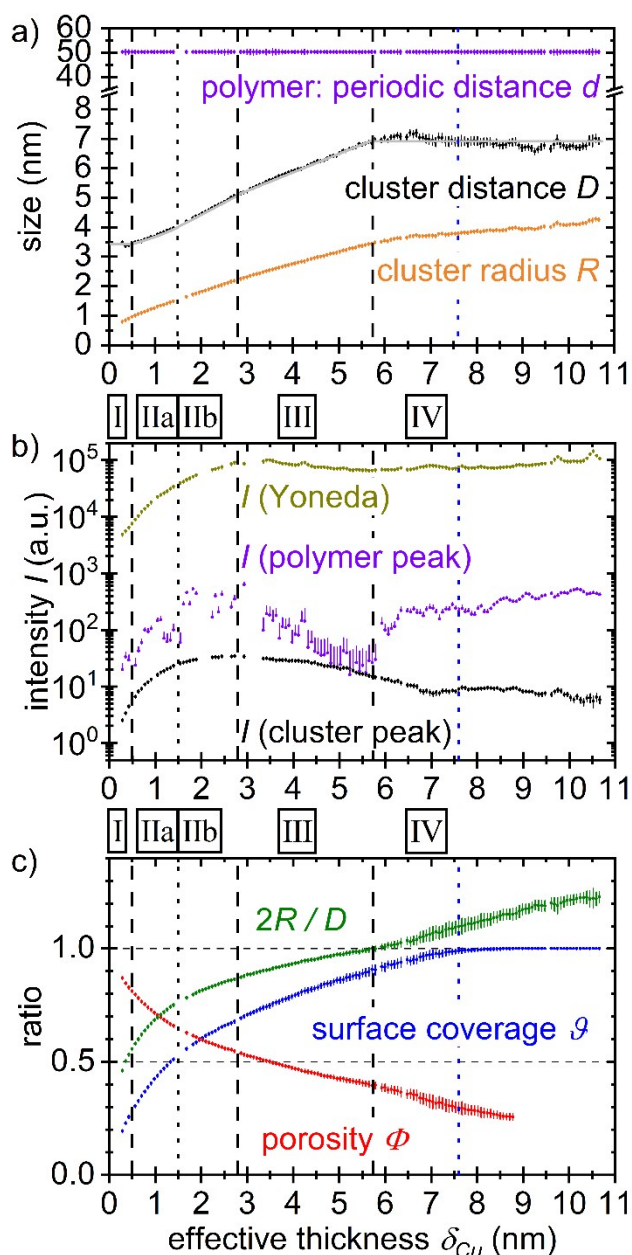

Figure S4 Evolution of structural and morphological parameters of Cu on PS-*b*-PEO during sputter deposition with 10 points binned. (a) The periodic distance of the polymer  $d$ , the cluster distance  $D$ , and the cluster radius  $R$  are plotted versus the effective thickness  $\delta_{Cu}$ . The grey lines are linear fits (regimes I, IIb, III, IV) and exponential fits (regime IIa) of the cluster distance  $D$ 's evolution characterizing the different growth stages (nucleation, diffusion-driven growth, adsorption-driven growth, grain growth). (b) Evolution of the peak intensities at  $q_y = 0 \text{ nm}^{-1}$  ( $I$  (Yoneda)), of the structure factor of the polymer at  $q_s$  ( $I$  (polymer peak)), and of the Cu clusters at  $q_s$  ( $I$  (cluster peak)) with increasing effective thickness  $\delta_{Cu}$ . The polymer peak intensity increase in stage II indicates a selective wetting of the PS domains. (c) Evolution of the  $2R/D$  ratio, surface coverage  $\theta$  and porosity  $\Phi$  with increasing effective thickness  $\delta_{Cu}$ . Dashed lines divide between different regions of the cluster growth (I, II, III, IV), while dotted lines within one region (IIa to IIb). The blue dotted line indicates  $\delta_{Cu}(\theta = 1) = (8.1 \pm 0.7) \text{ nm}$ , the point at which a full surface coverage is reached. A version of this graph without binning is shown in Figure 4.
